# Supplementary material for: A Mouse Model of Glycogen Storage Disease Type IX-Beta: A Role for Phkb in Glycogenolysis
Source: MDPI journal article supplement (doi:10.3390/ijms23179944), 2022-09-01
Supplement: s1 [file s1]

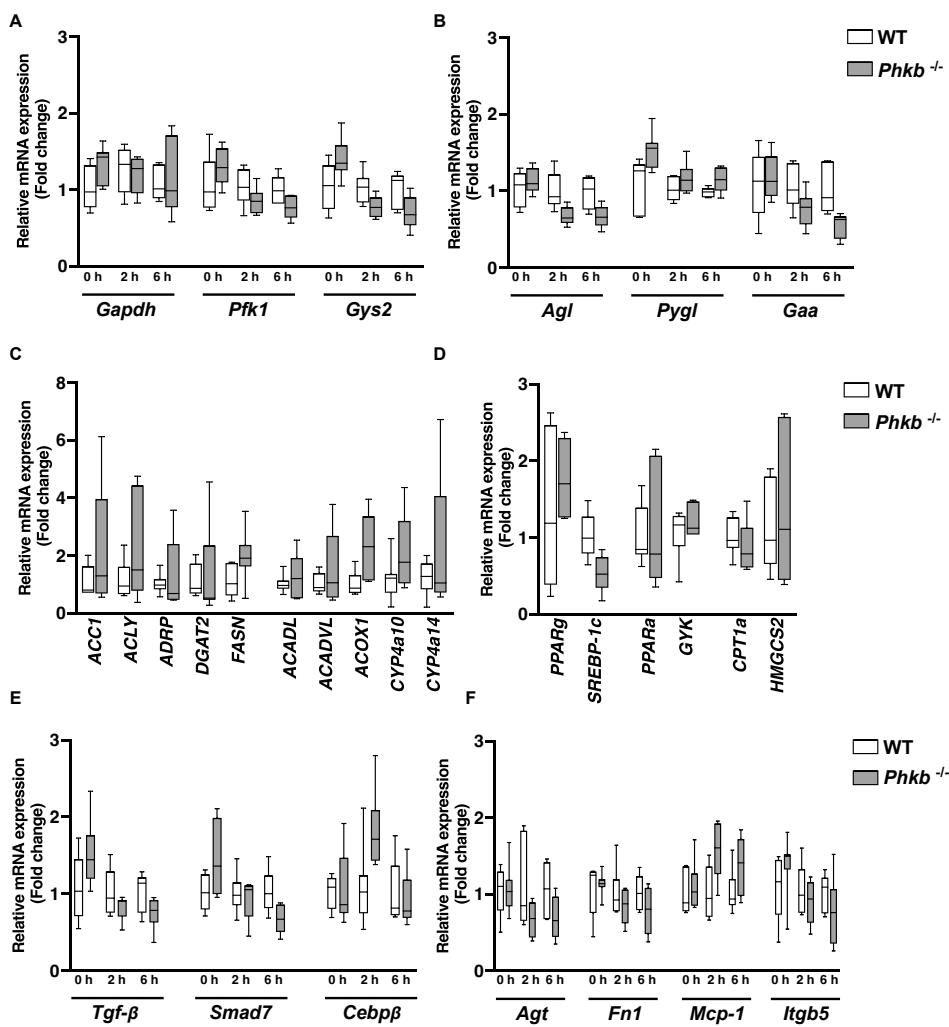

**Figure S1.** Expression profiles of fibrosis, glycolysis, glycogenolysis, lipogenesis, and lipid degradation related genes in WT and *Phkb*<sup>-/-</sup> mice. Quantification of hepatic mRNA related to (A) Glycolysis (*Gapdh*, *Pfk1*, and *Gys2*) and (B) Glycogenolysis (*Agl*, *Pygl*, and *Gaa*). WT (0 hr, n=5, 2 hr, n=7, and 6 hr, n=5) and *Phkb*<sup>-/-</sup> (0 hr, n=11, 2 hr, n=6, and 6 hr, n=5) mice. (C) Lipogenesis (genes (*Acc1*, *Acly*, *Adrp*, *Dgat2*, and *Fasn*) and lipid degradation related genes (*Acadl*, *Acadvl*, *Acox1*, *Cyp4a10*, and *Cyp4a14*), (D) Transcriptional regulator and transporters in WT (n=7) and *Phkb*<sup>-/-</sup> (n=7) mice. (E) signaling pathways of fibrosis (*Tgf-β*, *Smad7*, and *Cebp-β*). (F) profibrotic (*Agt* and *Fn1*) and inflammation related genes (*Mcp-1* and *Itgb5*). WT (0 hr, n=5, 2 hr, n=7, and 6 hr, n=6) and *Phkb*<sup>-/-</sup> (0 hr, n=10, 2 hr, n=6, and 6 hr, n=6) mice. Abbreviations: *TGFβ*, Transforming growth factor beta; *Smad7*, Mothers Against Decapentaplegic Homolog 7, *Cebpb*, CCAAT/Enhancer-Binding Protein Beta; *Agt*, Angiotensinogen; *Fn1*, Fibronectin 1; *Il-6*, Interleukin-6; *Mcp-1*, Monocyte chemoattractant protein 1; *Itgb1*, Integrin Subunit Beta 1 *Gapdh*: Glyceraldehyde-3-Phosphate Dehydrogenase; *Pfk1*, Phosphofructokinase, muscle; *Gys2*, Glycogen Synthase 2; *Agl*, Amylo-Alpha-1, 6-Glucosidase, 4-Alpha-Glucanotransferase (Glycogen Debranching Enzyme); *Pygl*, Glycogen Phosphorylase L; *Gaa*, Alpha Glucosidase; *ACC1*, Acetyl-CoA Carboxylase Alpha; *Acly*, ATP Citrate Lyase; *ADRP*, Adipose Differentiation-Related Protein; *DGAT2*, Diacylglycerol O-Acyltransferase 2; *FASN*, Fatty Acid Synthase; *ACADL*, Acyl-CoA Dehydrogenase Long Chain; *ACADVL*, Acyl-CoA Dehydrogenase Very Long Chain; *ACOX1*, Acyl-CoA Oxidase 1; *CYP4a10*, Cytochrome P450 Family 4 Subfamily A Polypeptide 10; *CYP4a14*, Cytochrome P450 Family 4 Subfamily A Polypeptide 14; *PPARG*, Peroxisome Proliferator Activated Receptor Gamma; *SREBP-1*, Sterol Regulatory Element-Binding Protein 1; *PPARα*, Peroxisome Proliferator Activated Receptor Alpha; *GYK*, Glycerol Kinase; *CPT1a*, Carnitine Palmitoyltransferase 1A; *HMGCS2*, 3-Hydroxy-3-Methylglutaryl-CoA Synthase 2

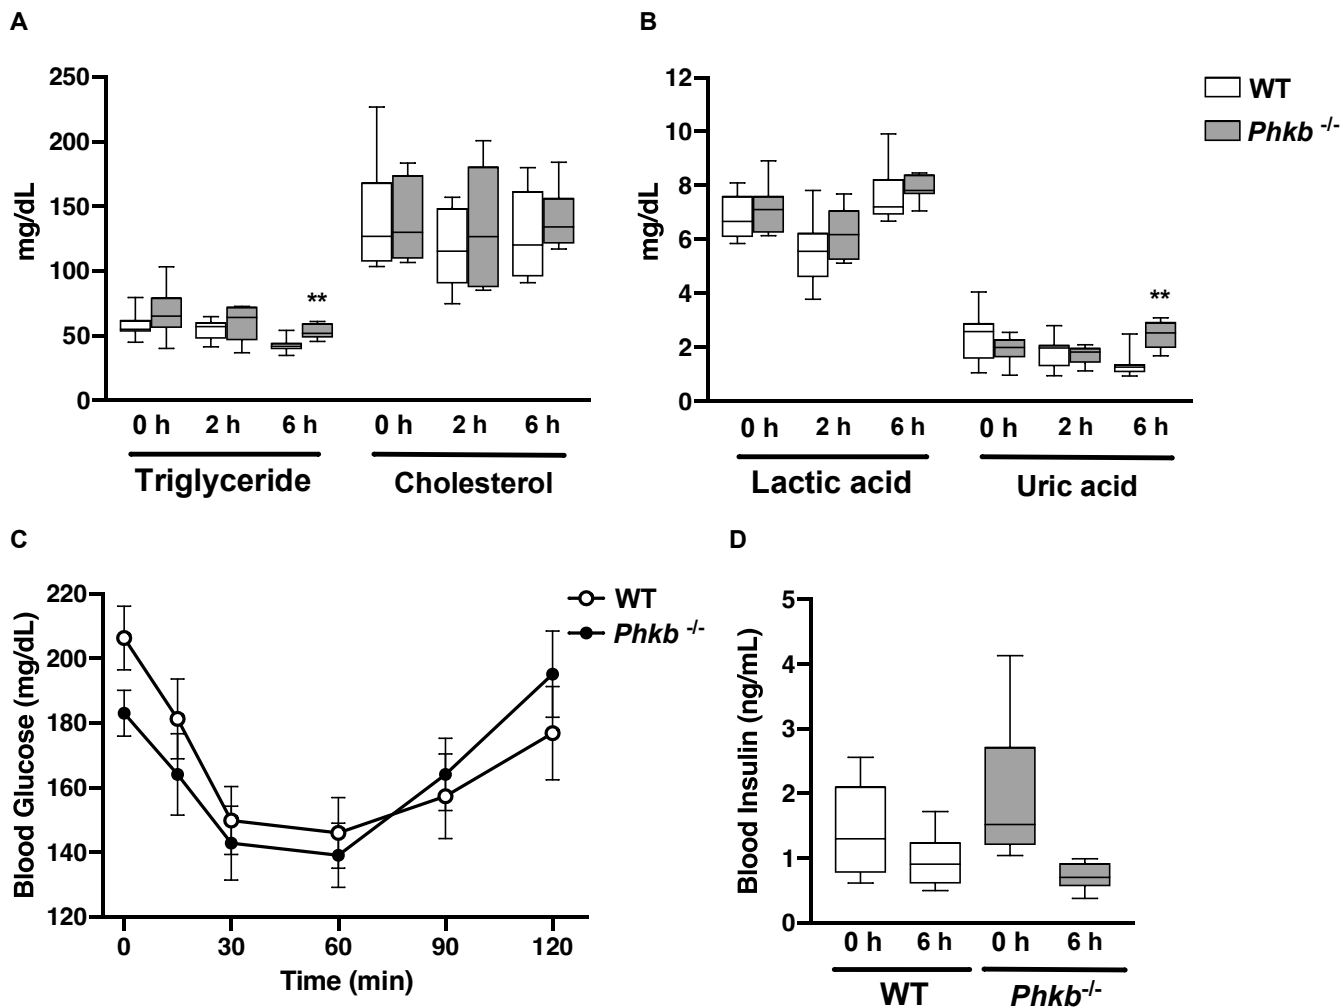

**Figure S2.** Blood metabolite concentration and insulin. The box-and-whisker plots showing serum **(A)** triglycerides and cholesterol. **(B)** lactic acid and uric acid. WT (0 hr, n=9, 2 hr, n=9, and 6 hr, n=9) and *Phkb*<sup>-/-</sup> (0 hr, n=9, 2 hr, n=6, and 6 hr, n=7) mice for plot (A) and (B). **(C)** Insulin tolerance profiles of WT (n=8) and *Phkb*<sup>-/-</sup> mice (n=8) treated with 0.5 IU/kg of insulin. **(D)** Non fasted and 6 hours fasted blood insulin levels in WT (0 hr, n=9 and 6 hr, n=9) and *Phkb*<sup>-/-</sup> (0 hr, n=9 and 6 hr, n=7) mice. \*\**P* < 0.01.

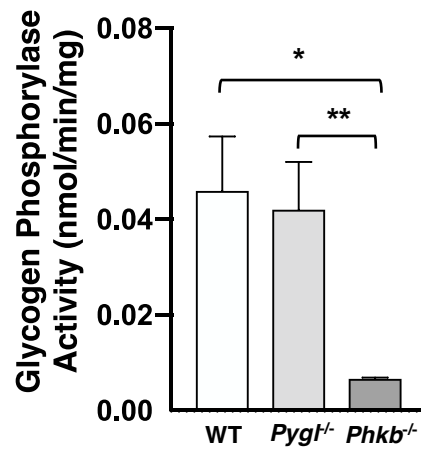

**Figure S3.** Enzymatic activity of glycogen phosphorylase (PYGL) in wild-type (n=4; WT, white bar), *Pygl*<sup>-/-</sup> (n=3, light grey bar) and *Phkb*<sup>-/-</sup> (n=4, grey bar) mice.

**Table S1.** PrimePCR qPCR Assay probes

| <b>Name</b>                                                   | <b>Unique Assay ID</b> | <b>Supplier</b>      |
|---------------------------------------------------------------|------------------------|----------------------|
| Mouse ribosomal protein mL19 (Rpl19)                          | qMmuCEP0042442         | Bio-Rad Laboratories |
| Liver glycogen phosphorylase (Pygl)                           | qMmuCIP0033749         | Bio-Rad Laboratories |
| Connective tissue growth factor (Ctgf)                        | qMmuCEP0053713         | Bio-Rad Laboratories |
| Interleukin-6 (IL-6)                                          | qMmuCID0005613         | Bio-Rad Laboratories |
| Chemokine ligand 5 (Ccl5; RANTES)                             | qMmuCID0021047         | Bio-Rad Laboratories |
| Collagen type 1 alpha 1 (Col1a1)                              | qMmuCEP0052648         | Bio-Rad Laboratories |
| Phosphorylase Kinase Beta (Phkb)                              | qMmuCED0049220         | Bio-Rad Laboratories |
| Monocyte chemoattractant protein 1 (Mcp-1)                    | qMmuCED0048300         | Bio-Rad Laboratories |
| Transforming growth factor b1 (Tgf- $\beta$ 1)                | qMmuCID0017320         | Bio-Rad Laboratories |
| Tumor necrosis factor alpha (Tnf- $\alpha$ )                  | qMmuCED0004141         | Bio-Rad Laboratories |
| Fibronectin 1 (Fn1)                                           | qMmuCID00019534        | Bio-Rad Laboratories |
| Mouse Glucose-6-Phosphatase (mG6pc)                           | qMmuCID0018783         | Bio-Rad Laboratories |
| Fructose-Bisphosphatase 1 (Fbp1)                              | qMmuCED0051060         | Bio-Rad Laboratories |
| Aldolase, Fructose-Bisphosphate B (Aldob)                     | qMmuCED0039716         | Bio-Rad Laboratories |
| Mothers Against Decapentaplegic Homolog 7 (Smad7)             | qMmuCED0046593         | Bio-Rad Laboratories |
| CCAAT/Enhancer-Binding Protein Beta (Cebpb)                   | qMmuCED0050360         | Bio-Rad Laboratories |
| Angiotensinogen (Agt)                                         | qMmuCID0019397         | Bio-Rad Laboratories |
| Integrin Subunit Beta 1 (Itgb5)                               | qMmuCED0045777         | Bio-Rad Laboratories |
| Glyceraldehyde-3-Phosphate Dehydrogenase (Gapdh)              | qMmuCED0027497         | Bio-Rad Laboratories |
| Phosphofructokinase, muscle (Pfk1)                            | qMmuCID0018472         | Bio-Rad Laboratories |
| Glycogen Synthase 2 (Gys2)                                    | qMmuCED0047720         | Bio-Rad Laboratories |
| Glycogen Debranching Enzyme (Agl)                             | qMmuCID0005882         | Bio-Rad Laboratories |
| Alpha Glucosidase (Gaa)                                       | qMmuCED0046677         | Bio-Rad Laboratories |
| Acetyl-CoA Carboxylase Alpha (Acc1)                           | qMmuCID0006041         | Bio-Rad Laboratories |
| ATP Citrate Lyase (Acly)                                      | qMmuCED0044791         | Bio-Rad Laboratories |
| Adipose Differentiation-Related Protein (ADRP)                | qMmuCID0016776         | Bio-Rad Laboratories |
| Diacylglycerol O-Acyltransferase 2 (DGAT2)                    | qMmuCID0012338         | Bio-Rad Laboratories |
| Fatty Acid Synthase (FASN)                                    | qMmuCED0045676         | Bio-Rad Laboratories |
| Acyl-CoA Dehydrogenase Long Chain (ACADL)                     | qMmuCID0018569         | Bio-Rad Laboratories |
| Acyl-CoA Dehydrogenase Very Long Chain (ACADVL)               | qMmuCED0004059         | Bio-Rad Laboratories |
| Acyl-CoA Oxidase 1 (ACOX1)                                    | qMmuCID0016828         | Bio-Rad Laboratories |
| Cytochrome P450 Family 4 Subfamily A Polypeptide 10 (CYP4a10) | qMmuCED0025157         | Bio-Rad Laboratories |
| Cytochrome P450 Family 4 Subfamily A Polypeptide 14 (CYP4a14) | qMmuCID0013174         | Bio-Rad Laboratories |
| Peroxisome Proliferator Activated Receptor Gamma (PPARG)      | qMmuCID0018821         | Bio-Rad Laboratories |
| Sterol Regulatory Element-Binding Protein 1 (SREBP-1c)        | qMmuCID0009315         | Bio-Rad Laboratories |

|                                                                   |                |                      |
|-------------------------------------------------------------------|----------------|----------------------|
| Peroxisome Proliferator Activated Receptor Alpha (PPAR $\alpha$ ) | qMmuCED0046526 | Bio-Rad Laboratories |
| Glycerol Kinase (GYK)                                             | qMmuCID0040086 | Bio-Rad Laboratories |
| Carnitine Palmitoyltransferase 1A (CPT1a)                         | qMmuCED0045595 | Bio-Rad Laboratories |
| 3-Hydroxy-3-Methylglutaryl-CoA Synthase 2 (HMGCS2)                | qMmuCID0016594 | Bio-Rad Laboratories |
|                                                                   |                |                      |
